# Supplementary material for: Differential effect of covalent protein modification and glutathione depletion on the transcriptional response of Nrf2 and NF-κB
Source: PubMed Central journal article supplement (PMC2884179; doi:10.1016/j.bcp.2010.04.004), 2010-08-01
Supplement: mmc1.pdf [file mmc1.pdf]

**Supplementary Figures**

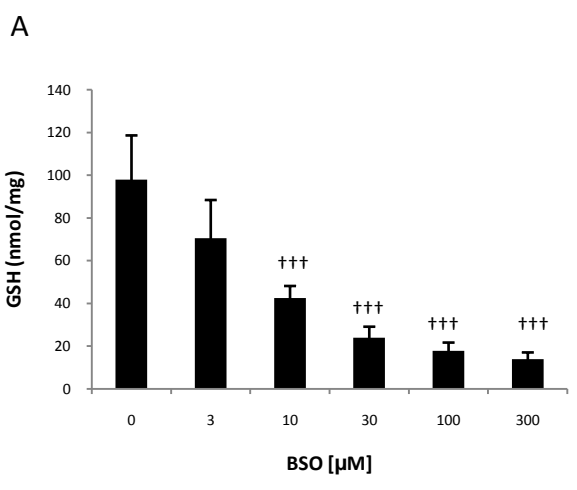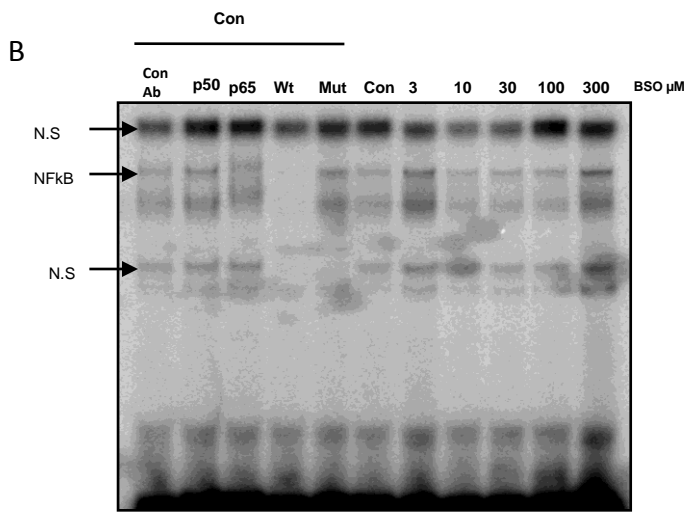

**Fig 1**

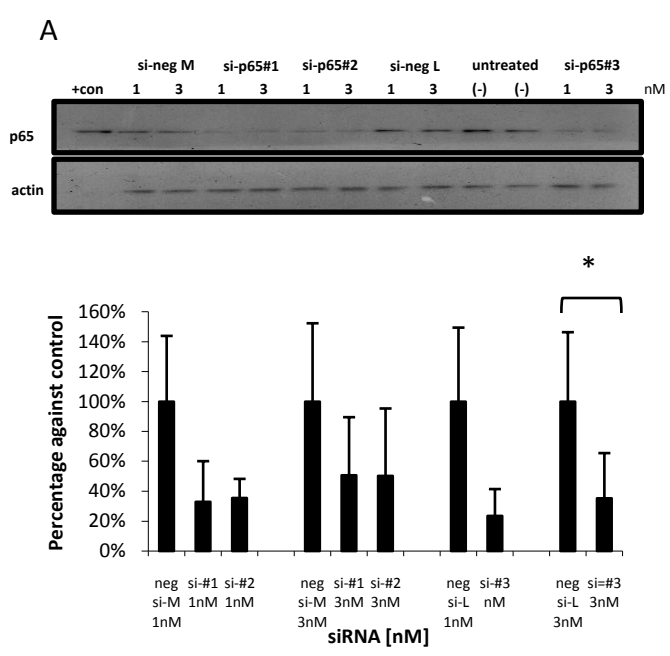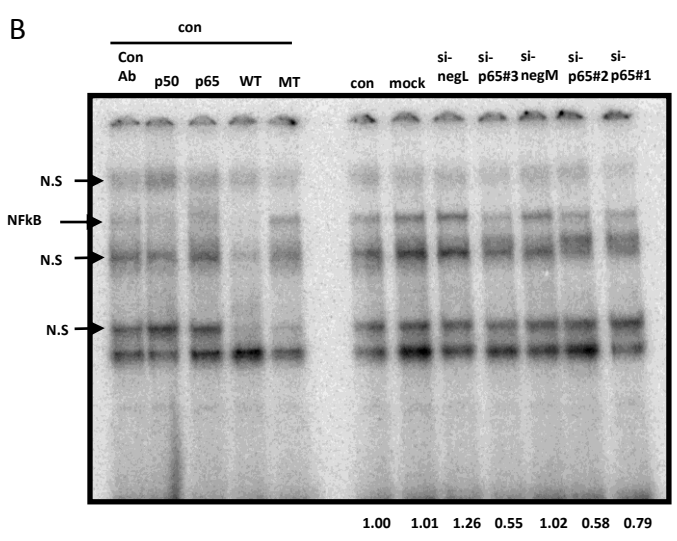

**Fig 2**
